# Supplementary material for: DeepWAS: Multivariate genotype-phenotype associations by directly integrating regulatory information using deep learning
Source: PubMed Central journal article supplement (PMC7043350; doi:10.1371/journal.pcbi.1007616), 2020-02-03

**A**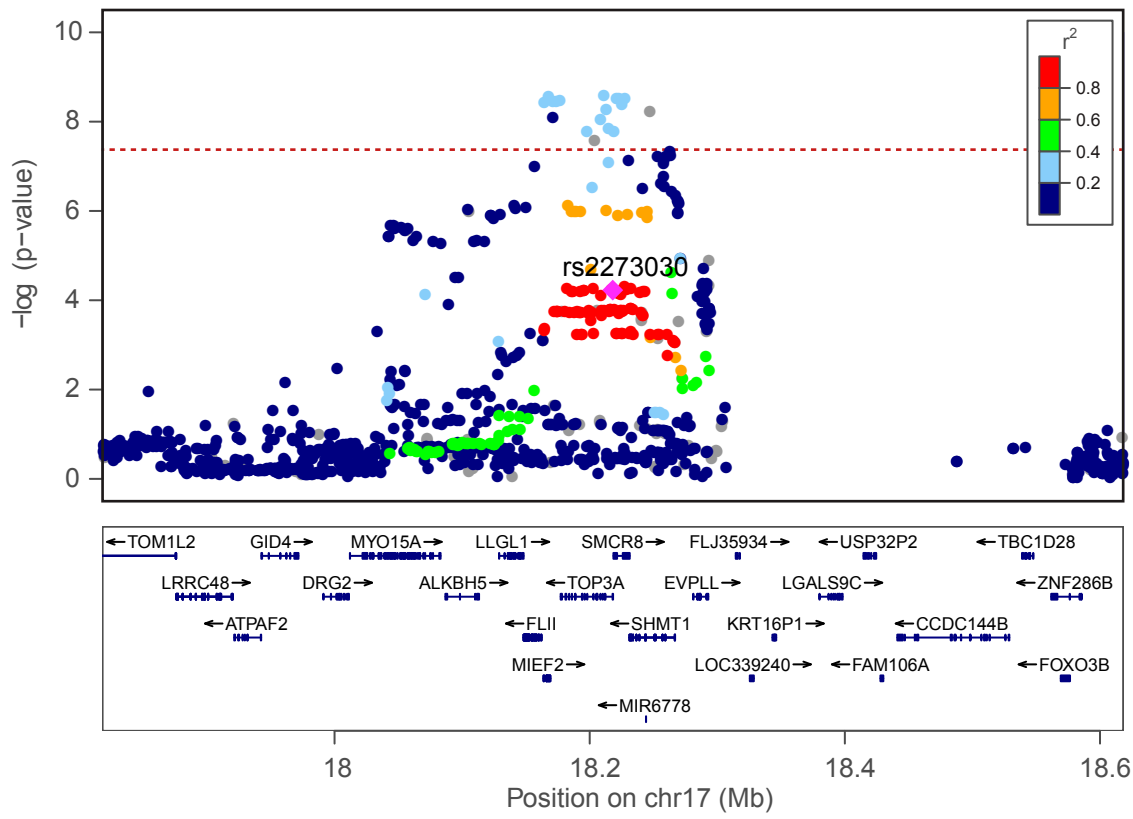**B**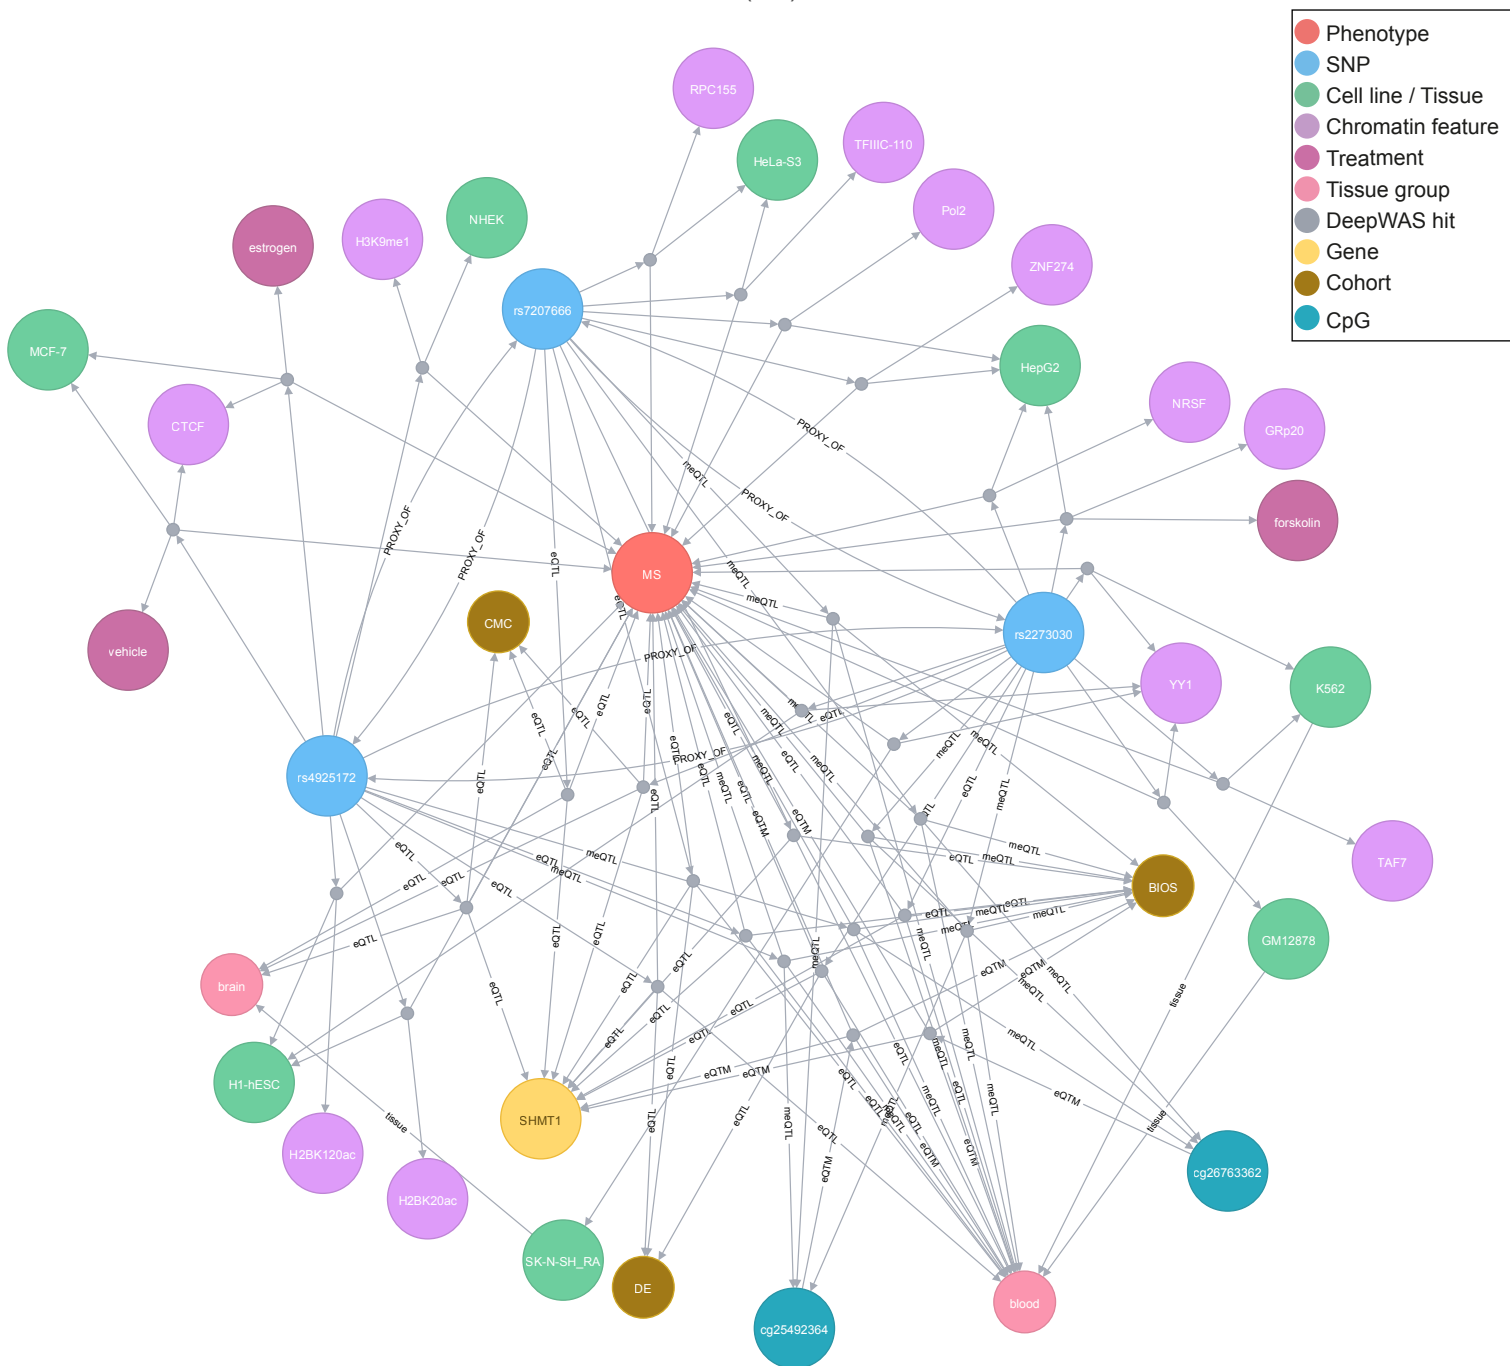

Supplement: pcbi.1007616.s003.pdf [file pcbi.1007616.s003.pdf]
