# Supplementary material for: DeepWAS: Multivariate genotype-phenotype associations by directly integrating regulatory information using deep learning
Source: PLoS Comput Biol. 2020 Feb 3;16(2):e1007616. doi: 10.1371/journal.pcbi.1007616 (PMC7043350; doi:10.1371/journal.pcbi.1007616)
Supplement: S1 Table — (XLSX) [file pcbi.1007616.s007.xlsx]

## Sheet: S1
cell line	regulatory element	treatment
A549	ATF3	EtOH_0.02pct
A549	BCL3	EtOH_0.02pct
A549	BHLHE40	None
A549	CEBPB	None
A549	CREB1	DEX_100nM
A549	CTCF	DEX_100nM
A549	CTCF	EtOH_0.02pct
A549	CTCF	None
A549	CTCF	None
A549	DNase	None
A549	ELF1	EtOH_0.02pct
A549	ETS1	EtOH_0.02pct
A549	FOSL2	EtOH_0.02pct
A549	FOXA1	DEX_100nM
A549	GABP	EtOH_0.02pct
A549	GR	DEX_100nM
A549	GR	DEX_500pM
A549	GR	DEX_50nM
A549	GR	DEX_5nM
A549	Max	None
A549	NRSF	EtOH_0.02pct
A549	p300	EtOH_0.02pct
A549	Pol2	DEX_100nM
A549	Pol2	EtOH_0.02pct
A549	Pol2	None
A549	Pol2(phosphoS2)	None
A549	Rad21	None
A549	Sin3Ak-20	EtOH_0.02pct
A549	SIX5	EtOH_0.02pct
A549	TAF1	EtOH_0.02pct
A549	TCF12	EtOH_0.02pct
A549	USF-1	DEX_100nM
A549	USF-1	EtOH_0.02pct
A549	USF-1	EtOH_0.02pct
A549	YY1	EtOH_0.02pct
A549	ZBTB33	EtOH_0.02pct
Adult_CD4_Th0	DNase	None
AG04449	CTCF	None
AG04449	DNase	None
AG04450	CTCF	None
AG04450	DNase	None
AG09309	CTCF	None
AG09309	DNase	None
AG09319	CTCF	None
AG09319	DNase	None
AG10803	CTCF	None
AG10803	DNase	None
AoAF	CTCF	None
AoAF	DNase	None
AoSMC	DNase	None
BE2_C	CTCF	None
BE2_C	DNase	None
BJ	CTCF	None
BJ	DNase	None
Caco-2	CTCF	None
Caco-2	DNase	None
CD20+	DNase	None
CD34+_Mobilized	DNase	None
Chorion	DNase	None
CLL	DNase	None
CMK	DNase	None
Dnd41	CTCF	None
Dnd41	EZH2	None
ECC-1	CTCF	DMSO_0.02pct
ECC-1	ERalpha	BPA_100nM
ECC-1	ERalpha	Estradiol_10nM
ECC-1	ERalpha	Genistein_100nM
ECC-1	FOXA1	DMSO_0.02pct
ECC-1	GR	DEX_100nM
ECC-1	Pol2	DMSO_0.02pct
Fibrobl	CTCF	None
Fibrobl	DNase	None
FibroP	DNase	None
Gliobla	CTCF	None
Gliobla	DNase	None
Gliobla	Pol2	None
GM06990	CTCF	None
GM06990	DNase	None
GM08714	ZNF274	None
GM10847	NFKB	TNFa
GM10847	Pol2	None
GM12801	CTCF	None
GM12864	CTCF	None
GM12864	DNase	None
GM12865	CTCF	None
GM12865	DNase	None
GM12872	CTCF	None
GM12873	CTCF	None
GM12874	CTCF	None
GM12875	CTCF	None
GM12878	ATF2	None
GM12878	ATF3	None
GM12878	BATF	None
GM12878	BCL11A	None
GM12878	BCL3	None
GM12878	BCLAF1	None
GM12878	BHLHE40	None
GM12878	BRCA1	None
GM12878	c-Fos	None
GM12878	c-Myc	None
GM12878	CEBPB	None
GM12878	CHD1	None
GM12878	CHD2	None
GM12878	COREST	None
GM12878	CTCF	None
GM12878	CTCF	None
GM12878	CTCF	None
GM12878	CTCF	None
GM12878	DNase	None
GM12878	E2F4	None
GM12878	EBF1	None
GM12878	EBF1	None
GM12878	Egr-1	None
GM12878	ELF1	None
GM12878	ELK1	None
GM12878	ETS1	None
GM12878	EZH2	None
GM12878	FOXM1	None
GM12878	GABP	None
GM12878	IKZF1	None
GM12878	IRF4	None
GM12878	JunD	None
GM12878	Max	None
GM12878	MAZ	None
GM12878	MEF2A	None
GM12878	MEF2C	None
GM12878	MTA3	None
GM12878	Mxi1	None
GM12878	NF-E2	None
GM12878	NF-YA	None
GM12878	NF-YB	None
GM12878	NFATC1	None
GM12878	NFIC	None
GM12878	NFKB	TNFa
GM12878	Nrf1	None
GM12878	NRSF	None
GM12878	p300	None
GM12878	p300	None
GM12878	p300	None
GM12878	PAX5-C20	None
GM12878	PAX5-N19	None
GM12878	Pbx3	None
GM12878	PML	None
GM12878	Pol2-4H8	None
GM12878	Pol2	None
GM12878	Pol2	None
GM12878	Pol2	None
GM12878	Pol2	None
GM12878	Pol2(phosphoS2)	None
GM12878	Pol3	None
GM12878	POU2F2	None
GM12878	PU.1	None
GM12878	Rad21	None
GM12878	Rad21	None
GM12878	RFX5	None
GM12878	RUNX3	None
GM12878	RXRA	None
GM12878	SIN3A	None
GM12878	SIX5	None
GM12878	SMC3	None
GM12878	SP1	None
GM12878	SRF	None
GM12878	STAT1	None
GM12878	STAT3	None
GM12878	STAT5A	None
GM12878	TAF1	None
GM12878	TBLR1	None
GM12878	TBP	None
GM12878	TCF12	None
GM12878	TCF3	None
GM12878	TR4	None
GM12878	USF-1	None
GM12878	USF2	None
GM12878	WHIP	None
GM12878	YY1	None
GM12878	YY1	None
GM12878	ZBTB33	None
GM12878	ZEB1	None
GM12878	Znf143	None
GM12878	ZNF274	None
GM12878	ZZZ3	None
GM12891	CTCF	None
GM12891	DNase	None
GM12891	NFKB	TNFa
GM12891	PAX5-C20	None
GM12891	Pol2-4H8	None
GM12891	Pol2	None
GM12891	Pol2	None
GM12891	POU2F2	None
GM12891	PU.1	None
GM12891	TAF1	None
GM12891	YY1	None
GM12892	CTCF	None
GM12892	DNase	None
GM12892	NFKB	TNFa
GM12892	PAX5-C20	None
GM12892	Pol2-4H8	None
GM12892	Pol2	None
GM12892	Pol2	None
GM12892	TAF1	None
GM12892	YY1	None
GM15510	NFKB	TNFa
GM15510	Pol2	None
GM18505	NFKB	TNFa
GM18505	Pol2	None
GM18507	DNase	None
GM18526	NFKB	TNFa
GM18526	Pol2	None
GM18951	NFKB	TNFa
GM18951	Pol2	None
GM19099	NFKB	TNFa
GM19099	Pol2	None
GM19193	NFKB	TNFa
GM19193	Pol2	None
GM19238	CTCF	None
GM19238	DNase	None
GM19239	CTCF	None
GM19239	DNase	None
GM19240	CTCF	None
GM19240	DNase	None
H1-hESC	ATF2	None
H1-hESC	ATF3	None
H1-hESC	Bach1	None
H1-hESC	BCL11A	None
H1-hESC	BRCA1	None
H1-hESC	c-Jun	None
H1-hESC	c-Myc	None
H1-hESC	c-Myc	None
H1-hESC	CEBPB	None
H1-hESC	CHD1	None
H1-hESC	CHD1	None
H1-hESC	CHD2	None
H1-hESC	CtBP2	None
H1-hESC	CTCF	None
H1-hESC	CTCF	None
H1-hESC	CTCF	None
H1-hESC	DNase	None
H1-hESC	Egr-1	None
H1-hESC	EZH2	None
H1-hESC	FOSL1	None
H1-hESC	GABP	None
H1-hESC	GTF2F1	None
H1-hESC	H2AK5ac	None
H1-hESC	H2AZ	None
H1-hESC	H2BK120ac	None
H1-hESC	H2BK12ac	None
H1-hESC	H2BK15ac	None
H1-hESC	H2BK20ac	None
H1-hESC	H2BK5ac	None
H1-hESC	H3K14ac	None
H1-hESC	H3K18ac	None
H1-hESC	H3K23ac	None
H1-hESC	H3K23me2	None
H1-hESC	H3K27ac	None
H1-hESC	H3K27me3	None
H1-hESC	H3K36me3	None
H1-hESC	H3K4ac	None
H1-hESC	H3K4me1	None
H1-hESC	H3K4me2	None
H1-hESC	H3K4me3	None
H1-hESC	H3K56ac	None
H1-hESC	H3K79me1	None
H1-hESC	H3K79me2	None
H1-hESC	H3K9ac	None
H1-hESC	H3K9me3	None
H1-hESC	H4K20me1	None
H1-hESC	H4K5ac	None
H1-hESC	H4K8ac	None
H1-hESC	H4K91ac	None
H1-hESC	HDAC2	None
H1-hESC	JARID1A	None
H1-hESC	JunD	None
H1-hESC	JunD	None
H1-hESC	MafK	None
H1-hESC	Max	None
H1-hESC	Mxi1	None
H1-hESC	NANOG	None
H1-hESC	Nrf1	None
H1-hESC	NRSF	None
H1-hESC	p300	None
H1-hESC	Pol2-4H8	None
H1-hESC	Pol2	None
H1-hESC	Pol2	None
H1-hESC	POU5F1	None
H1-hESC	Rad21	None
H1-hESC	Rad21	None
H1-hESC	RBBP5	None
H1-hESC	RFX5	None
H1-hESC	RXRA	None
H1-hESC	SIN3A	None
H1-hESC	Sin3Ak-20	None
H1-hESC	SIX5	None
H1-hESC	SP1	None
H1-hESC	SP2	None
H1-hESC	SP4	None
H1-hESC	SRF	None
H1-hESC	SUZ12	None
H1-hESC	TAF1	None
H1-hESC	TAF7	None
H1-hESC	TBP	None
H1-hESC	TCF12	None
H1-hESC	TEAD4	None
H1-hESC	USF-1	None
H1-hESC	USF2	None
H1-hESC	YY1	None
H1-hESC	Znf143	None
H7-hESC	DNase	None
H9ES	DNase	None
HA-h	DNase	None
HA-sp	CTCF	None
HA-sp	DNase	None
HAc	CTCF	None
HAc	DNase	None
HAEpiC	DNase	None
HBMEC	CTCF	None
HBMEC	DNase	None
HCF	DNase	None
HCFaa	CTCF	None
HCFaa	DNase	None
HCM	CTCF	None
HCM	DNase	None
HConF	DNase	None
HCPEpiC	CTCF	None
HCPEpiC	DNase	None
HCT-116	CTCF	None
HCT-116	DNase	None
HCT-116	Pol2-4H8	None
HCT-116	Pol2	None
HCT-116	TCF7L2	None
HCT-116	YY1	None
HCT-116	ZBTB33	None
HEEpiC	CTCF	None
HEEpiC	DNase	None
HEK293	CTCF	None
HEK293	ELK4	None
HEK293	KAP1	None
HEK293	Pol2	None
HEK293-T-REx	ZNF263	None
HEK293	TCF7L2	None
HeLa-S3	AP-2alpha	None
HeLa-S3	AP-2gamma	None
HeLa-S3	BAF155	None
HeLa-S3	BAF170	None
HeLa-S3	BDP1	None
HeLa-S3	BRCA1	None
HeLa-S3	BRF1	None
HeLa-S3	BRF2	None
HeLa-S3	Brg1	None
HeLa-S3	c-Fos	None
HeLa-S3	c-Jun	None
HeLa-S3	c-Myc	None
HeLa-S3	c-Myc	None
HeLa-S3	CEBPB	None
HeLa-S3	CHD2	None
HeLa-S3	COREST	None
HeLa-S3	CTCF	None
HeLa-S3	CTCF	None
HeLa-S3	CTCF	None
HeLa-S3	DNase	IFNa4h
HeLa-S3	DNase	None
HeLa-S3	E2F1	None
HeLa-S3	E2F4	None
HeLa-S3	E2F6	None
HeLa-S3	ELK1	None
HeLa-S3	ELK4	None
HeLa-S3	EZH2	None
HeLa-S3	GABP	None
HeLa-S3	GTF2F1	None
HeLa-S3	HA-E2F1	None
HeLa-S3	Ini1	None
HeLa-S3	IRF3	None
HeLa-S3	JunD	None
HeLa-S3	MafK	None
HeLa-S3	Max	None
HeLa-S3	MAZ	None
HeLa-S3	Mxi1	None
HeLa-S3	NF-YA	None
HeLa-S3	NF-YB	None
HeLa-S3	Nrf1	None
HeLa-S3	NRSF	None
HeLa-S3	p300	None
HeLa-S3	Pol2(b)	None
HeLa-S3	Pol2	None
HeLa-S3	Pol2	None
HeLa-S3	Pol2	None
HeLa-S3	Pol2(phosphoS2)	None
HeLa-S3	PRDM1	None
HeLa-S3	Rad21	None
HeLa-S3	RFX5	None
HeLa-S3	RPC155	None
HeLa-S3	SMC3	None
HeLa-S3	SPT20	None
HeLa-S3	STAT1	IFNg30
HeLa-S3	STAT3	None
HeLa-S3	TAF1	None
HeLa-S3	TBP	None
HeLa-S3	TCF7L2	None
HeLa-S3	TCF7L2	None
HeLa-S3	TFIIIC-110	None
HeLa-S3	TR4	None
HeLa-S3	USF2	None
HeLa-S3	ZKSCAN1	None
HeLa-S3	Znf143	None
HeLa-S3	ZNF274	None
HeLa-S3	ZZZ3	None
Hepatocytes	DNase	None
HepG2	ARID3A	None
HepG2	ATF3	None
HepG2	BHLHE40	None
HepG2	BHLHE40	None
HepG2	BRCA1	None
HepG2	c-Jun	None
HepG2	c-Myc	None
HepG2	CEBPB	forskolin
HepG2	CEBPB	None
HepG2	CEBPB	None
HepG2	CEBPD	None
HepG2	CHD2	None
HepG2	COREST	None
HepG2	CTCF	None
HepG2	CTCF	None
HepG2	CTCF	None
HepG2	CTCF	None
HepG2	DNase	None
HepG2	ELF1	None
HepG2	ERRA	forskolin
HepG2	EZH2	None
HepG2	FOSL2	None
HepG2	FOXA1	None
HepG2	FOXA1	None
HepG2	FOXA2	None
HepG2	GABP	None
HepG2	GRp20	forskolin
HepG2	HDAC2	None
HepG2	HNF4A	forskolin
HepG2	HNF4A	None
HepG2	HNF4G	None
HepG2	HSF1	forskolin
HepG2	IRF3	None
HepG2	JunD	None
HepG2	JunD	None
HepG2	MafF	None
HepG2	MafK	None
HepG2	MafK	None
HepG2	Max	None
HepG2	MAZ	None
HepG2	MBD4	None
HepG2	Mxi1	None
HepG2	MYBL2	None
HepG2	NFIC	None
HepG2	Nrf1	None
HepG2	NRSF	None
HepG2	NRSF	None
HepG2	p300	None
HepG2	p300	None
HepG2	PGC1A	forskolin
HepG2	Pol2-4H8	None
HepG2	Pol2	forskolin
HepG2	Pol2	None
HepG2	Pol2	None
HepG2	Pol2	None
HepG2	Pol2(phosphoS2)	None
HepG2	Rad21	None
HepG2	Rad21	None
HepG2	RFX5	None
HepG2	RXRA	None
HepG2	Sin3Ak-20	None
HepG2	SMC3	None
HepG2	SP1	None
HepG2	SP2	None
HepG2	SRF	None
HepG2	TAF1	None
HepG2	TBP	None
HepG2	TCF12	None
HepG2	TCF7L2	None
HepG2	TEAD4	None
HepG2	TR4	None
HepG2	USF-1	None
HepG2	USF2	None
HepG2	YY1	None
HepG2	ZBTB33	None
HepG2	ZBTB7A	None
HepG2	ZNF274	None
HFF	CTCF	None
HFF	DNase	None
HFF-Myc	CTCF	None
HFF-Myc	DNase	None
HGF	DNase	None
HIPEpiC	DNase	None
HL-60	CTCF	None
HL-60	DNase	None
HMEC	CTCF	None
HMEC	CTCF	None
HMEC	DNase	None
HMEC	EZH2	None
HMF	CTCF	None
HMF	DNase	None
HMVEC-dAd	DNase	None
HMVEC-dBl-Ad	DNase	None
HMVEC-dBl-Neo	DNase	None
HMVEC-dLy-Ad	DNase	None
HMVEC-dLy-Neo	DNase	None
HMVEC-dNeo	DNase	None
HMVEC-LBl	DNase	None
HMVEC-LLy	DNase	None
HNPCEpiC	DNase	None
HPAEC	DNase	None
HPAF	CTCF	None
HPAF	DNase	None
HPDE6-E6E7	DNase	None
HPdLF	DNase	None
HPF	CTCF	None
HPF	DNase	None
HRCEpiC	DNase	None
HRE	CTCF	None
HRE	DNase	None
HRGEC	DNase	None
HRPEpiC	CTCF	None
HRPEpiC	DNase	None
HSMM_emb	DNase	None
HSMM	CTCF	None
HSMM	DNase	None
HSMM	EZH2	None
HSMMtube	CTCF	None
HSMMtube	DNase	None
HSMMtube	EZH2	None
HTR8svn	DNase	None
Huh-7.5	DNase	None
Huh-7	DNase	None
HUVEC	c-Fos	None
HUVEC	c-Jun	None
HUVEC	c-Myc	None
HUVEC	CTCF	None
HUVEC	CTCF	None
HUVEC	CTCF	None
HUVEC	DNase	None
HUVEC	EZH2	None
HUVEC	GATA-2	None
HUVEC	Max	None
HUVEC	Pol2-4H8	None
HUVEC	Pol2(b)	None
HUVEC	Pol2	None
HUVEC	Pol2	None
HUVEC	Pol2	None
HVMF	CTCF	None
HVMF	DNase	None
IMR90	CEBPB	None
IMR90	CTCF	None
IMR90	MafK	None
IMR90	Pol2	None
IMR90	Rad21	None
iPS	DNase	None
Ishikawa	DNase	4OHTAM_20nM_72hr
Ishikawa	DNase	Estradiol_100nM_1hr
Jurkat	DNase	None
K562	ARID3A	None
K562	ATF1	None
K562	ATF3	None
K562	ATF3	None
K562	Bach1	None
K562	BCL3	None
K562	BCLAF1	None
K562	BDP1	None
K562	BHLHE40	None
K562	BRF1	None
K562	BRF2	None
K562	Brg1	None
K562	c-Fos	None
K562	c-Jun	IFNa30
K562	c-Jun	IFNa6h
K562	c-Jun	IFNg30
K562	c-Jun	IFNg6h
K562	c-Jun	None
K562	c-Myc	IFNa30
K562	c-Myc	IFNa6h
K562	c-Myc	IFNg30
K562	c-Myc	IFNg6h
K562	c-Myc	None
K562	c-Myc	None
K562	c-Myc	None
K562	CBX3	None
K562	CCNT2	None
K562	CEBPB	None
K562	CEBPB	None
K562	CHD1	None
K562	CHD2	None
K562	COREST	None
K562	COREST	None
K562	CTCF	None
K562	CTCF	None
K562	CTCF	None
K562	CTCF	None
K562	CTCF	None
K562	CTCFL	None
K562	DNase	None
K562	E2F4	None
K562	E2F6	None
K562	E2F6	None
K562	eGFP-FOS	None
K562	eGFP-GATA2	None
K562	eGFP-HDAC8	None
K562	eGFP-JunB	None
K562	eGFP-JunD	None
K562	Egr-1	None
K562	ELF1	None
K562	ELK1	None
K562	ETS1	None
K562	EZH2	None
K562	FOSL1	None
K562	GABP	None
K562	GATA-1	None
K562	GATA-2	None
K562	GATA2	None
K562	GTF2B	None
K562	GTF2F1	None
K562	H2AZ	None
K562	H3K27ac	None
K562	H3K27me3	None
K562	H3K36me3	None
K562	H3K4me1	None
K562	H3K4me2	None
K562	H3K4me3	None
K562	H3K79me2	None
K562	H3K9ac	None
K562	H3K9me1	None
K562	H3K9me3	None
K562	H4K20me1	None
K562	HDAC1	None
K562	HDAC2	None
K562	HDAC2	None
K562	HDAC6	None
K562	HMGN3	None
K562	Ini1	None
K562	IRF1	IFNa30
K562	IRF1	IFNa6h
K562	IRF1	IFNg30
K562	IRF1	IFNg6h
K562	JunD	None
K562	KAP1	None
K562	MafF	None
K562	MafK	None
K562	Max	None
K562	Max	None
K562	MAZ	None
K562	MEF2A	None
K562	Mxi1	None
K562	NELFe	None
K562	NF-E2	None
K562	NF-YA	None
K562	NF-YB	None
K562	NR2F2	None
K562	Nrf1	None
K562	NRSF	None
K562	p300	None
K562	p300	None
K562	PHF8	None
K562	PLU1	None
K562	PML	None
K562	Pol2-4H8	None
K562	Pol2(b)	None
K562	Pol2	IFNa30
K562	Pol2	IFNa6h
K562	Pol2	IFNg30
K562	Pol2	IFNg6h
K562	Pol2	None
K562	Pol2	None
K562	Pol2	None
K562	Pol2	None
K562	Pol2(phosphoS2)	None
K562	Pol2(phosphoS2)	None
K562	Pol3	None
K562	PU.1	None
K562	Rad21	None
K562	Rad21	None
K562	RBBP5	None
K562	RFX5	None
K562	RPC155	None
K562	SAP30	None
K562	SETDB1	MNaseD
K562	SETDB1	None
K562	Sin3Ak-20	None
K562	SIRT6	None
K562	SIX5	None
K562	SMC3	None
K562	SP1	None
K562	SP2	None
K562	SRF	None
K562	STAT1	IFNa30
K562	STAT1	IFNa6h
K562	STAT1	IFNg30
K562	STAT1	IFNg6h
K562	STAT2	IFNa30
K562	STAT2	IFNa6h
K562	STAT5A	None
K562	TAF1	None
K562	TAF7	None
K562	TAL1	None
K562	TBLR1	None
K562	TBLR1	None
K562	TBP	None
K562	TEAD4	None
K562	TFIIIC-110	None
K562	THAP1	None
K562	TR4	None
K562	TRIM28	None
K562	UBF	None
K562	UBTF	None
K562	USF-1	None
K562	USF2	None
K562	YY1	None
K562	YY1	None
K562	YY1	None
K562	ZBTB33	None
K562	ZBTB7A	None
K562	Znf143	None
K562	ZNF263	None
K562	ZNF274	None
K562	ZNF274	None
LNCaP	DNase	androgen
LNCaP	DNase	None
MCF-7	c-Myc	estrogen
MCF-7	c-Myc	serum_starved_media
MCF-7	c-Myc	serum_stimulated_media
MCF-7	c-Myc	vehicle
MCF-7	CTCF	estrogen
MCF-7	CTCF	None
MCF-7	CTCF	None
MCF-7	CTCF	serum_starved_media
MCF-7	CTCF	serum_stimulated_media
MCF-7	CTCF	vehicle
MCF-7	DNase	Hypoxia_LacAcid
MCF-7	DNase	None
MCF-7	GATA3	None
MCF-7	GATA3	None
MCF-7	HA-E2F1	None
MCF-7	Pol2	None
MCF-7	Pol2	serum_starved_media
MCF-7	Pol2	serum_stimulated_media
MCF-7	TCF7L2	None
MCF-7	ZNF217	None
MCF10A-Er-Src	c-Fos	4OHTAM_1uM_12hr
MCF10A-Er-Src	c-Fos	4OHTAM_1uM_36hr
MCF10A-Er-Src	c-Fos	4OHTAM_1uM_4hr
MCF10A-Er-Src	c-Fos	EtOH_0.01pct
MCF10A-Er-Src	c-Myc	4OHTAM_1uM_4hr
MCF10A-Er-Src	c-Myc	EtOH_0.01pct
MCF10A-Er-Src	E2F4	4OHTAM_1uM_36hr
MCF10A-Er-Src	Pol2	4OHTAM_1uM_36hr
MCF10A-Er-Src	Pol2	EtOH_0.01pct
MCF10A-Er-Src	STAT3	4OHTAM_1uM_12hr
MCF10A-Er-Src	STAT3	4OHTAM_1uM_36hr
MCF10A-Er-Src	STAT3	EtOH_0.01pct
MCF10A-Er-Src	STAT3	EtOH_0.01pct_12hr
MCF10A-Er-Src	STAT3	EtOH_0.01pct_4hr
Medullo	DNase	None
Melano	DNase	None
Monocytes-CD14+_RO01746	DNase	None
Monocytes-CD14+RO01746Â	H2AZ	None
Monocytes-CD14+RO01746Â	H3K27ac	None
Monocytes-CD14+RO01746Â	H3K27me3	None
Monocytes-CD14+RO01746Â	H3K36me3	None
Monocytes-CD14+RO01746Â	H3K4me1	None
Monocytes-CD14+RO01746Â	H3K4me2	None
Monocytes-CD14+RO01746Â	H3K4me3	None
Monocytes-CD14+RO01746Â	H3K79me2	None
Monocytes-CD14+RO01746Â	H3K9ac	None
Monocytes-CD14+RO01746Â	H3K9me3	None
Monocytes-CD14+RO01746Â	H4K20me1	None
Myometr	DNase	None
NA	NA	NA
NB4	c-Myc	None
NB4	CTCF	None
NB4	DNase	None
NB4	Max	None
NB4	Pol2	None
NH-A	CTCF	None
NH-A	DNase	None
NH-A	EZH2	None
NH-A	H2AZ	None
NH-A	H3K27ac	None
NH-A	H3K27me3	None
NH-A	H3K36me3	None
NH-A	H3K4me1	None
NH-A	H3K4me2	None
NH-A	H3K4me3	None
NH-A	H3K79me2	None
NH-A	H3K9ac	None
NH-A	H3K9me3	None
NH-A	H4K20me1	None
NHDF-Ad	CTCF	None
NHDF-Ad	DNase	None
NHDF-Ad	EZH2	None
NHDF-Ad	H2AZ	None
NHDF-Ad	H3K27ac	None
NHDF-Ad	H3K27me3	None
NHDF-Ad	H3K36me3	None
NHDF-Ad	H3K4me1	None
NHDF-Ad	H3K4me2	None
NHDF-Ad	H3K4me3	None
NHDF-Ad	H3K79me2	None
NHDF-Ad	H3K9ac	None
NHDF-Ad	H3K9me3	None
NHDF-Ad	H4K20me1	None
NHDF-neo	CTCF	None
NHDF-neo	DNase	None
NHEK	CTCF	None
NHEK	CTCF	None
NHEK	CTCF	None
NHEK	DNase	None
NHEK	EZH2	None
NHEK	H2AZ	None
NHEK	H3K27ac	None
NHEK	H3K27me3	None
NHEK	H3K36me3	None
NHEK	H3K4me1	None
NHEK	H3K4me2	None
NHEK	H3K4me3	None
NHEK	H3K79me2	None
NHEK	H3K9ac	None
NHEK	H3K9me1	None
NHEK	H3K9me3	None
NHEK	H4K20me1	None
NHEK	Pol2(b)	None
NHLF	CTCF	None
NHLF	CTCF	None
NHLF	DNase	None
NHLF	EZH2	None
NHLF	H2AZ	None
NHLF	H3K27ac	None
NHLF	H3K27me3	None
NHLF	H3K36me3	None
NHLF	H3K4me1	None
NHLF	H3K4me2	None
NHLF	H3K4me3	None
NHLF	H3K79me2	None
NHLF	H3K9ac	None
NHLF	H3K9me3	None
NHLF	H4K20me1	None
NT2-D1	DNase	None
NT2-D1	SUZ12	None
NT2-D1	YY1	None
NT2-D1	ZNF274	None
Osteobl	CTCF	None
Osteobl	DNase	None
Osteoblasts	H2AZ	None
Osteoblasts	H3K27ac	None
Osteoblasts	H3K27me3	None
Osteoblasts	H3K36me3	None
Osteoblasts	H3K4me1	None
Osteoblasts	H3K4me2	None
Osteoblasts	H3K4me3	None
Osteoblasts	H3K79me2	None
Osteoblasts	H3K9me3	None
PANC-1	DNase	None
PANC-1	NRSF	None
PANC-1	Pol2-4H8	None
PANC-1	Sin3Ak-20	None
PANC-1	TCF7L2	None
PanIsletD	DNase	None
PanIslets	DNase	None
PBDE	GATA-1	None
PBDE	Pol2	None
PBDEFetal	GATA-1	None
PFSK-1	FOXP2	None
PFSK-1	NRSF	None
PFSK-1	Sin3Ak-20	None
PFSK-1	TAF1	None
pHTE	DNase	None
PrEC	DNase	None
ProgFib	CTCF	None
ProgFib	DNase	None
ProgFib	Pol2	None
Raji	Pol2	None
RPTEC	CTCF	None
RPTEC	DNase	None
RWPE1	DNase	None
SAEC	CTCF	None
SAEC	DNase	None
SH-SY5Y	GATA-2	None
SH-SY5Y	GATA3	None
SK-N-MC	DNase	None
SK-N-MC	FOXP2	None
SK-N-MC	Pol2-4H8	None
SK-N-SH_RA	CTCF	None
SK-N-SH_RA	CTCF	None
SK-N-SH_RA	DNase	None
SK-N-SH_RA	p300	None
SK-N-SH_RA	Rad21	None
SK-N-SH_RA	USF1	None
SK-N-SH_RA	YY1	None
SK-N-SH	NRSF	None
SK-N-SH	NRSF	None
SK-N-SH	Pol2-4H8	None
SK-N-SH	Sin3Ak-20	None
SK-N-SH	TAF1	None
SKMC	DNase	None
Stellate	DNase	None
T-47D	CTCF	DMSO_0.02pct
T-47D	DNase	None
T-47D	ERalpha	BPA_100nM
T-47D	ERalpha	Estradiol_10nM
T-47D	ERalpha	Genistein_100nM
T-47D	FOXA1	DMSO_0.02pct
T-47D	GATA3	DMSO_0.02pct
T-47D	p300	DMSO_0.02pct
Th1	DNase	None
Th2	DNase	None
U2OS	KAP1	None
U2OS	SETDB1	None
U87	NRSF	None
U87	Pol2-4H8	None
Urothelia	DNase	None
Urothelia	DNase	UT189
WERI-Rb-1	CTCF	None
WERI-Rb-1	DNase	None
WI-38	CTCF	None
WI-38	DNase	4OHTAM_20nM_72hr
WI-38	DNase	None
8988T	DNase	None
